# Supplementary material for: An effective and recyclable decolorization method for polysaccharides from Isaria cicadae Miquel by magnetic chitosan microspheres
Source: Royal Society of Chemistry journal article supplement (doi:10.1039/d1ra07758a), 2022-01-01
Supplement: d1ra07758a1.pdf [file d1ra07758a1.pdf]

## **An effective and recyclable decolorization method for polysaccharide from *Isaria cicadae* Miquel by magnetic chitosan microspheres**

Bingbing Yu <sup>1,a</sup>, Yao Chen <sup>1,c</sup>, Lijun Zhu <sup>1,c</sup>, Mengmeng Ban <sup>a</sup>, Li Yang <sup>a</sup>, Yeda Zeng <sup>a</sup>, Shijie Li <sup>c</sup>, Chunzhi Tang <sup>c</sup>, Danyan Zhang <sup>a,\*</sup>, Xiaoqing Chen <sup>b,\*\*</sup>

<sup>a</sup> School of Pharmaceutical Sciences, Guangzhou University of Chinese Medicine, Guangzhou 510006, Guangdong, PR China

<sup>b</sup> The First Affiliated Hospital of Guangzhou University of Chinese Medicine, Guangzhou 510405, Guangdong, China

<sup>c</sup> Clinical Medical College of Acupuncture Moxibustion and Rehabilitation, Guangzhou University of Chinese Medicine, Guangzhou 510006, Guangdong, PR China

---

\*\* Corresponding author: Xiaoqing Chen, Email: chenxiaoqing86@163.com

\* Corresponding author: Danyan Zhang, Email: danyan64@163.com

<sup>1</sup> These authors contributed equally to this paper.

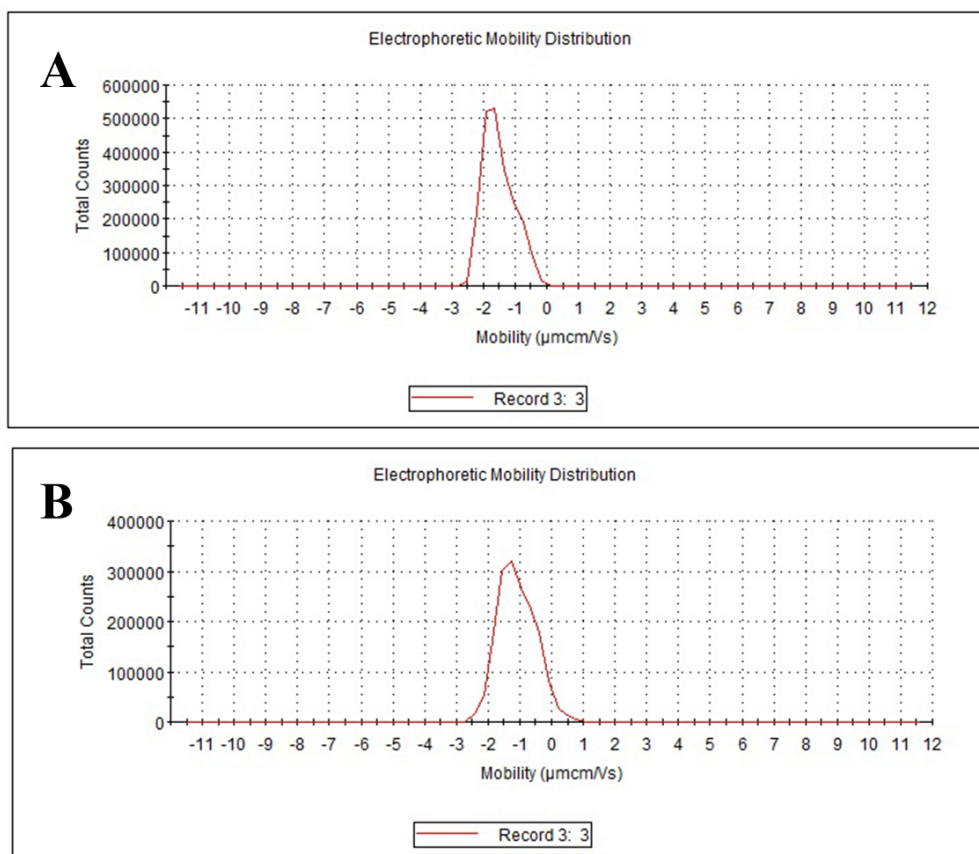

**Figure S1.** Zeta potential scanning diagram before (A) and after (B) decolorization. (Zeta potential value before decolorization was -19.3mV; Zeta potential value after decolorization was -13.8mV)

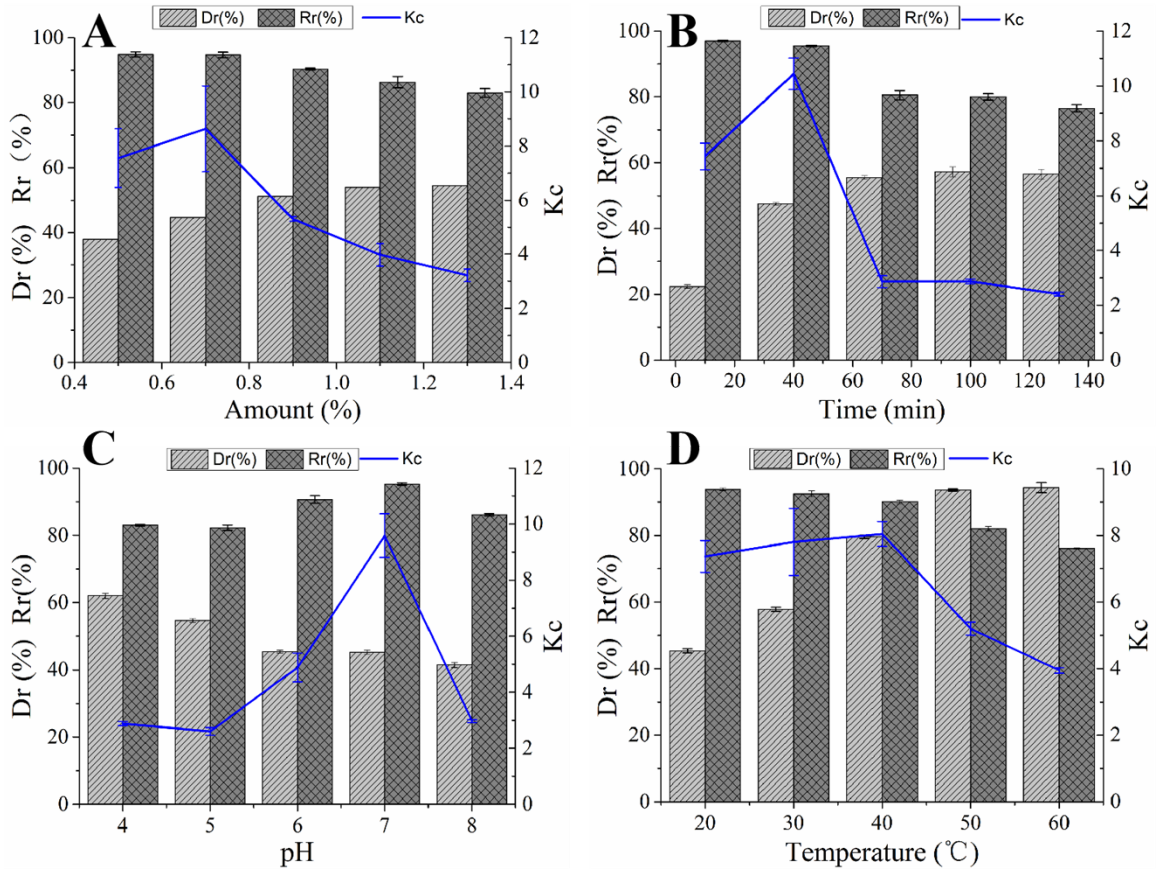

**Figure S2.** Effects of different amount of activated carbon (A), adsorption time (B), pH (C) and adsorption temperature (D) on the efficiency of decolorization. (n=3)

**Table S1.** Design and results of activated carbon adsorption response surface methodology.

| No. | A(%) | B(min) | C    | D(°C) | K <sub>C</sub> |
|-----|------|--------|------|-------|----------------|
| 1   | 0.50 | 40.00  | 6.00 | 40.00 | 6.66005        |
| 2   | 0.90 | 40.00  | 7.00 | 50.00 | 4.76597        |
| 3   | 0.70 | 70.00  | 6.00 | 40.00 | 6.14895        |
| 4   | 0.70 | 10.00  | 8.00 | 40.00 | 5.98488        |
| 5   | 0.70 | 10.00  | 7.00 | 50.00 | 5.6687         |
| 6   | 0.50 | 40.00  | 7.00 | 50.00 | 7.29           |
| 7   | 0.70 | 40.00  | 7.00 | 40.00 | 7.96436        |
| 8   | 0.70 | 10.00  | 7.00 | 30.00 | 4.64446        |
| 9   | 0.70 | 40.00  | 7.00 | 40.00 | 8.15839        |
| 10  | 0.50 | 10.00  | 7.00 | 40.00 | 5.75           |
| 11  | 0.70 | 40.00  | 8.00 | 50.00 | 5.64398        |
| 12  | 0.70 | 70.00  | 7.00 | 50.00 | 5.01128        |
| 13  | 0.70 | 10.00  | 6.00 | 40.00 | 6.06418        |
| 14  | 0.50 | 40.00  | 8.00 | 40.00 | 5.99112        |
| 15  | 0.70 | 40.00  | 7.00 | 40.00 | 7.90734        |
| 16  | 0.90 | 40.00  | 6.00 | 40.00 | 6.23969        |
| 17  | 0.90 | 40.00  | 8.00 | 40.00 | 5.12598        |
| 18  | 0.70 | 40.00  | 7.00 | 40.00 | 8.19519        |
| 19  | 0.50 | 40.00  | 7.00 | 30.00 | 5.18663        |

|    |      |       |       |       |         |
|----|------|-------|-------|-------|---------|
| 20 | 0.70 | 70.00 | 8.00  | 40.00 | 4.8708  |
| 21 | 0.90 | 10.00 | 7.00  | 40.00 | 5.23866 |
| 22 | 0.70 | 70.00 | 7.00  | 30.00 | 5.3659  |
| 23 | 0.50 | 70.00 | 7.00  | 40.00 | 6.24351 |
| 24 | 0.70 | 40.00 | 6.00  | 50.00 | 7.71247 |
| 25 | 0.70 | 40.00 | 70.00 | 40.00 | 7.83561 |
| 26 | 0.90 | 70.00 | 70.00 | 40.00 | 4.89007 |
| 27 | 0.90 | 40.00 | 7.00  | 30.00 | 5.10136 |
| 28 | 0.70 | 40.00 | 8.00  | 30.00 | 5.81921 |
| 29 | 0.70 | 40.00 | 6.00  | 30.00 | 5.93517 |

A, B, C, D are the amount of activated carbon, adsorption time, pH and adsorption temperature.

**Table S2.** Analysis of variance for fitted quadratic polynomial model

| Source | SS    | DF | MS    | F-value | P-value  | Significance |
|--------|-------|----|-------|---------|----------|--------------|
| Model  | 34.29 | 14 | 2.45  | 28.11   | < 0.0001 | **           |
| A      | 2.76  | 1  | 2.76  | 31.72   | < 0.0001 | **           |
| B      | 0.056 | 1  | 0.056 | 0.64    | 0.4358   |              |
| C      | 2.36  | 1  | 2.36  | 27.11   | 0.0001   | **           |
| D      | 1.36  | 1  | 1.36  | 15.61   | 0.0015   | **           |
| AB     | 0.18  | 1  | 0.18  | 2.03    | 0.1757   |              |

|                |       |    |       |        |          |    |
|----------------|-------|----|-------|--------|----------|----|
| AC             | 0.049 | 1  | 0.049 | 0.57   | 0.4637   |    |
| AD             | 1.49  | 1  | 1.49  | 17.06  | 0.0010   | ** |
| BC             | 0.36  | 1  | 0.36  | 4.12   | 0.0617   |    |
| BD             | 0.48  | 1  | 0.48  | 5.45   | 0.0349   | *  |
| CD             | 0.95  | 1  | 0.95  | 10.94  | 0.0052   | ** |
| A <sup>2</sup> | 8.86  | 1  | 8.86  | 101.68 | < 0.0001 | ** |
| B <sup>2</sup> | 14.48 | 1  | 14.48 | 166.13 | < 0.0001 | ** |
| C <sup>2</sup> | 3.22  | 1  | 3.22  | 36.95  | < 0.0001 | ** |
| D <sup>2</sup> | 9.51  | 1  | 9.51  | 109.16 | < 0.0001 | ** |
| Residual       | 1.22  | 14 | 0.087 |        |          |    |
| Lack of fit    | 1.12  | 10 | 0.11  | 4.51   | 0.0797   |    |
| Pure error     | 0.099 | 4  | 0.025 |        |          |    |
| Cor. total     | 35.51 | 28 |       |        |          |    |

---

$R^2=0.9656$ ,  $R_{adj}^2=0.9313$ , “\*\*\*” was very significant ( $P<0.01$ ), “\*\*” was significant ( $P<0.05$ ), SS denotes sum of squares; DF denotes degree of freedom; MS denotes mean square.

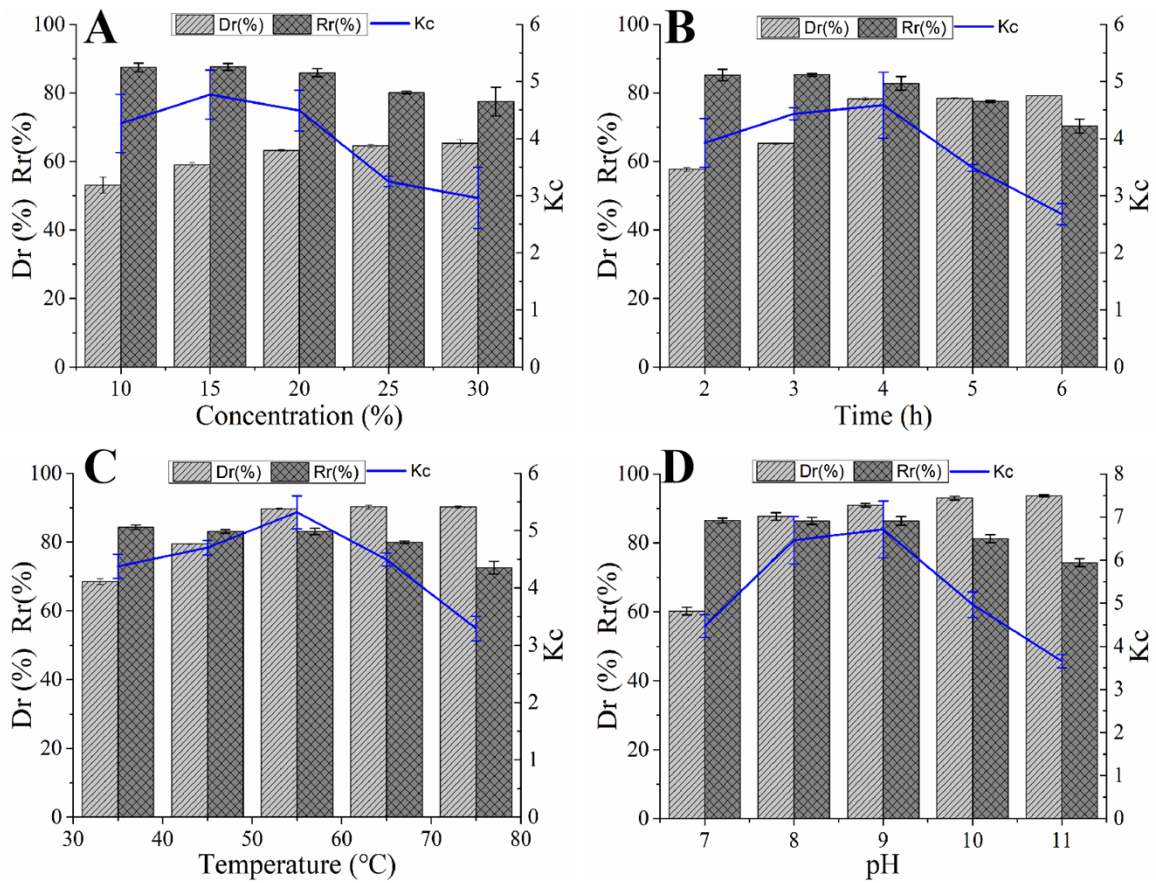

**Figure S4.** Effects of different concentration of hydrogen peroxide (A), adsorption time (B), adsorption temperature (C) and pH (D) on the efficiency of decolorization. (n=3)

**Table S3.** Design and results of hydrogen peroxide oxidation response surface methodology

| No. | A(%)  | B(min) | C(°C) | D     | K <sub>C</sub> |
|-----|-------|--------|-------|-------|----------------|
| 1   | 15.00 | 240.00 | 55.00 | 9.00  | 6.7922         |
| 2   | 10.00 | 300.00 | 55.00 | 9.00  | 5.543          |
| 3   | 20.00 | 180.00 | 55.00 | 9.00  | 5.86584        |
| 4   | 15.00 | 240.00 | 55.00 | 9.00  | 6.69963        |
| 5   | 15.00 | 300.00 | 65.00 | 9.00  | 4.72802        |
| 6   | 10.00 | 180.00 | 55.00 | 9.00  | 6.2595         |
| 7   | 20.00 | 240.00 | 65.00 | 9.00  | 4.84775        |
| 8   | 10.00 | 240.00 | 55.00 | 9.00  | 6.07799        |
| 9   | 15.00 | 300.00 | 55.00 | 8.00  | 6.07326        |
| 10  | 15.00 | 240.00 | 55.00 | 9.00  | 6.73735        |
| 11  | 20.00 | 300.00 | 55.00 | 9.00  | 4.50276        |
| 12  | 15.00 | 240.00 | 55.00 | 9.00  | 6.83257        |
| 13  | 15.00 | 180.00 | 55.00 | 8.00  | 6.01247        |
| 14  | 15.00 | 180.00 | 65.00 | 10.00 | 5.02065        |
| 15  | 15.00 | 240.00 | 65.00 | 10.00 | 5.08233        |
| 16  | 15.00 | 240.00 | 65.00 | 8.00  | 6.02562        |
| 17  | 20.00 | 240.00 | 55.00 | 10.00 | 5.22141        |
| 18  | 15.00 | 240.00 | 45.00 | 8.00  | 6.00526        |
| 19  | 15.00 | 180.00 | 55.00 | 10.00 | 6.28471        |



|    |       |        |       |       |         |
|----|-------|--------|-------|-------|---------|
| 20 | 15.00 | 180.00 | 45.00 | 9.00  | 6.51351 |
| 21 | 15.00 | 300.00 | 45.00 | 9.00  | 5.87543 |
| 22 | 15.00 | 240.00 | 45.00 | 10.00 | 6.47326 |
| 23 | 10.00 | 240.00 | 55.00 | 10.00 | 5.86891 |
| 24 | 20.00 | 240.00 | 55.00 | 9.00  | 4.96873 |
| 25 | 20.00 | 240.00 | 55.00 | 8.00  | 6.06979 |
| 26 | 15.00 | 300.00 | 55.00 | 10.00 | 5.0428  |
| 27 | 15.00 | 240.00 | 55.00 | 9.00  | 6.1922  |
| 28 | 10.00 | 240.00 | 65.00 | 9.00  | 5.62795 |
| 29 | 10.00 | 240.00 | 45.00 | 9.00  | 6.2808  |

---

A, B, C, D are the concentration of Hydrogen peroxide, adsorption time, adsorption temperature and pH.

**Table S4.** Analysis of variance for fitted quadratic polynomial model

| Source         | SS    | DF | MS    | F-value | P-value  | Significance |
|----------------|-------|----|-------|---------|----------|--------------|
| Model          | 11.17 | 14 | 0.8   | 9.04    | < 0.0001 | **           |
| A              | 1.46  | 1  | 1.46  | 16.52   | 0.0012   | **           |
| B              | 1.46  | 1  | 1.46  | 16.59   | 0.0011   | **           |
| C              | 1.91  | 1  | 1.91  | 21.62   | 0.0004   | **           |
| D              | 0.44  | 1  | 0.44  | 4.96    | 0.0429   | *            |
| AB             | 0.10  | 1  | 0.10  | 1.18    | 0.2948   |              |
| AC             | 0.071 | 1  | 0.071 | 0.80    | 0.3858   |              |
| AD             | 0.10  | 1  | 0.10  | 1.16    | 0.3001   |              |
| BC             | 0.030 | 1  | 0.030 | 0.34    | 0.5702   |              |
| BD             | 0.42  | 1  | 0.42  | 4.81    | 0.0457   | *            |
| CD             | 0.50  | 1  | 0.50  | 5.64    | 0.0324   | *            |
| A <sup>2</sup> | 2.43  | 1  | 2.43  | 27.49   | 0.0001   | **           |
| B <sup>2</sup> | 1.88  | 1  | 1.88  | 21.29   | 0.0004   | **           |
| C <sup>2</sup> | 2.12  | 1  | 2.12  | 24.07   | 0.0002   | **           |
| D <sup>2</sup> | 0.32  | 1  | 0.32  | 3.68    | 0.0758   |              |
| Residual       | 1.24  | 14 | 0.088 |         |          |              |
| Lack of fit    | 0.96  | 10 | 0.096 | 1.41    | 0.3965   |              |

|            |      |   |       |
|------------|------|---|-------|
| Pure error | 0.27 | 4 | 0.068 |
|------------|------|---|-------|

|            |       |    |  |
|------------|-------|----|--|
| Cor. total | 12.41 | 28 |  |
|------------|-------|----|--|

---

$R^2=0.9004$ ,  $R_{adj}^2=0.8008$ , “\*\*\*” was very significant ( $P<0.01$ ), “\*\*” was significant ( $P<0.05$ ), SS denotes sum of squares; DF denotes degree of freedom; MS denotes mean square.

**Table S5.** Optimum decolorization conditions.

| Experimental factors        | Activated carbon adsorption |                   | Hydrogen peroxide oxidation |                   |
|-----------------------------|-----------------------------|-------------------|-----------------------------|-------------------|
|                             | Theoretical conditions      | Actual conditions | Theoretical conditions      | Actual conditions |
| Amount (%)                  | 0.65                        | 0.65              | 13.25                       | 13                |
| Adsorption time(min)        | 40.06                       | 40                | 211.97                      | 212               |
| Adsorption temperature (°C) | 42.83                       | 43                | 49.24                       | 49                |
| pH value                    | 6.61                        | 7                 | 9.49                        | 9.5               |
